# Supplementary material for: Impact of multiple sclerosis disease-modifying therapies on SARS-CoV-2 vaccine-induced antibody and T cell immunity
Source: bioRxiv or medRxiv preprint supplement (doi:10.1101/2021.09.10.21262933), 2021-09-20
Supplement: Supplementary file [file media-1.pdf]

| <b>Immune cell subset panel</b>                 |              |                    |               |                  |
|-------------------------------------------------|--------------|--------------------|---------------|------------------|
| <b>Antibody target</b>                          | <b>Clone</b> | <b>Fluorophore</b> | <b>Vendor</b> | <b>Catalog #</b> |
| CD3                                             | OKT3         | Alexa 647          | BioLegend     | 317312           |
| CD4                                             | A161A1       | PE                 | BioLegend     | 357404           |
| CD8                                             | SK1          | Alexa 700          | BioLegend     | 344724           |
| CD14                                            | HCD14        | BV421              | BioLegend     | 325628           |
| CD16                                            | B73.1        | PE-Cy7             | BioLegend     | 360708           |
| CD19                                            | HIB19        | PerCP-Cy5.5        | BioLegend     | 302230           |
| Live/dead dye                                   |              | eFluor 506         | Invitrogen    | 65-0866-14       |
| <b>Activation induced marker (AIM) panel</b>    |              |                    |               |                  |
| <b>Antibody target</b>                          | <b>Clone</b> | <b>Fluorophore</b> | <b>Vendor</b> | <b>Catalog #</b> |
| CD4                                             | OKT4         | Alexa 488          | BioLegend     | 317420           |
| CD8                                             | SK1          | Alexa 700          | BioLegend     | 344724           |
| OX-40 (CD134)                                   | ACT35        | PE-Dazzle 594      | BioLegend     | 350020           |
| CD69                                            | FN-50        | PE                 | BioLegend     | 310906           |
| 4-1BB (CD137)                                   | 4B4-1        | BV421              | BioLegend     | 309820           |
| CD14                                            | HCD14        | PerCP-Cy5.5        | BioLegend     | 325622           |
| CD16                                            | B73.1        | PerCP-Cy5.5        | BioLegend     | 360712           |
| CD19                                            | HIB19        | PerCP-Cy5.5        | BioLegend     | 302230           |
| Live/dead dye                                   |              | eFluor 506         | Invitrogen    | 65-0866-14       |
| <b>Intracellular cytokine stimulation (ICS)</b> |              |                    |               |                  |
| <b>Antibody target</b>                          | <b>Clone</b> | <b>Fluorophore</b> | <b>Vendor</b> | <b>Catalog #</b> |
| CD4                                             | A161A1       | PE                 | BioLegend     | 357404           |
| CD8                                             | SK1          | Alexa 700          | BioLegend     | 344724           |
| CD14                                            | HCD14        | PerCP-Cy5.5        | BioLegend     | 325622           |
| CD16                                            | B73.1        | PerCP-Cy5.5        | BioLegend     | 360712           |
| CD19                                            | HIB19        | PerCP-Cy5.5        | BioLegend     | 302230           |
| IFN $\gamma$                                    | 4S.B3        | Alexa 647          | BioLegend     | 502516           |
| TNF $\alpha$                                    | MAb11        | Alexa 488          | BioLegend     | 502915           |
| IL-2                                            | MQ1-17H12    | BV421              | BioLegend     | 500328           |
| IL-4                                            | MP4-25D2     | APC-Cy7            | BioLegend     | 500833           |
| IL-10                                           | JES3-9D7     | PE-Dazzle 594      | BioLegend     | 501426           |
| Live/dead dye                                   |              | eFluor 506         | Invitrogen    | 65-0866-14       |
| <b>Tetramer panel</b>                           |              |                    |               |                  |
| <b>Antibody target</b>                          | <b>Clone</b> | <b>Fluorophore</b> | <b>Vendor</b> | <b>Catalog #</b> |
| CD8                                             | SK1          | PE-Cy7             | eBioscience   | 25-0087-42       |
| CD4                                             | RPA-T4       | PerCP-Cy5.5        | BioLegend     | 300530           |
| CD14                                            | HCD14        | PerCP-Cy5.5        | BioLegend     | 325622           |
| CD16                                            | B73.1        | PerCP-Cy5.5        | BioLegend     | 360712           |
| CD19                                            | HIB19        | PerCP-Cy5.5        | BioLegend     | 302230           |
| CCR7                                            | G043H7       | Alexa 488          | BioLegend     | 353206           |
| CD45RA                                          | HI100        | APC/Fire 750       | BioLegend     | 304152           |
| Streptavidin                                    |              | PE                 | Invitrogen    | S866             |
| Streptavidin                                    |              | APC                | Invitrogen    | S868             |
| Streptavidin                                    |              | BV421              | BioLegend     | 405225           |
| Streptavidin                                    |              | PE-Dazzle 594      | BioLegend     | 405247           |
| Live/dead dye                                   |              | eFluor 506         | Invitrogen    | 65-0866-14       |

**Supplemental Table 1. Flow cytometry panel overview.** Antibodies labeled with the same fluorophore in a given panel were used to create a 'dump' channel for exclusion of the designated populations.

| <b>Tetramer panel 1</b> |                          |                      |                      |
|-------------------------|--------------------------|----------------------|----------------------|
| <b>Epitope</b>          | <b>MHC I restriction</b> | <b>Fluorophore 1</b> | <b>Fluorophore 2</b> |
| YLQPRTFLL               | A*02:01                  | PE                   | APC                  |
| RLQSLQTYV               | A*02:01                  | PE                   | BV421                |
| VVFLHVTYV               | A*02:01                  | PE                   | PE-Dazzle 594        |
| SPRRARSV A              | B*07:02                  | PE-Dazzle 594        | BV421                |
| APHGVVFL                | B*07:02                  | PE-Dazzle 594        | APC                  |
| <b>Tetramer panel 2</b> |                          |                      |                      |
| <b>Epitope</b>          | <b>MHC I restriction</b> | <b>Fluorophore 1</b> | <b>Fluorophore 2</b> |
| KCYGVSP TK              | A*03:01                  | PE                   | APC                  |
| GVYFAST EK              | A*03:01                  | PE                   | BV421                |
| GVYFAST EK              | A*11:01                  | PE                   | PE-Dazzle 594        |
| GTHWFVTQR               | A*11:01                  | PE-Dazzle 594        | BV421                |
| RLFRKSNLK               | A*11:01                  | PE-Dazzle 594        | APC                  |
| <b>Tetramer panel 3</b> |                          |                      |                      |
| <b>Epitope</b>          | <b>MHC I restriction</b> | <b>Fluorophore 1</b> | <b>Fluorophore 2</b> |
| KCYGVSP TK              | A*03:01                  | PE                   | APC                  |
| GVYFAST EK              | A*03:01                  | PE                   | BV421                |
| LTDEMI AQY              | A*01:01                  | PE                   | PE-Dazzle 594        |

**Supplemental Table 2. Overview of pMHC I tetramer panels.** The epitope, MHC I restriction, and fluorophore combinations used for the indicated tetramer panels are shown.

| Sample ID | Treatment | HLA restriction for tetramer staining |             |             | Tetramer panel |
|-----------|-----------|---------------------------------------|-------------|-------------|----------------|
| HCCOV001  | HC        | HLA-A*11:01                           |             |             | 2              |
| HCCOV003  | HC        | HLA-A*03:01                           | HLA-A*11:01 |             | 2              |
| HCCOV009  | HC        | HLA-A*11:01                           |             |             | 2              |
| HCCOV011  | HC        | HLA-A*02:01                           | HLA-B*07:02 |             | 1              |
| HCCOV015  | HC        | HLA-A*02:01                           |             |             | 1              |
| MSCOV020  | None      | HLA-A*03:01                           |             |             | 2              |
| MSCOV027  | None      | HLA-A*02:01                           | HLA-B*07:02 |             | 1              |
| MSCOV059  | None      | HLA-A*02:01                           |             |             | 1              |
| MSCOV070  | None      | HLA-A*02:01                           |             |             | 1              |
| MSCOV082  | None      | HLA-A*03:01                           |             |             | 2              |
| MSCOV009  | GA        | HLA-B*07:02                           |             |             | 1              |
| MSCOV047  | GA        | HLA-B*07:02                           |             |             | 1              |
| MSCOV077  | GA        | HLA-B*07:02                           | HLA-A*11:01 |             | 1 & 2          |
| MSCOV010  | DMF       | HLA-A*01:01                           |             |             | 3              |
| MSCOV021  | DMF       | HLA-A*03:01                           |             |             | 2              |
| MSCOV035  | DMF       | HLA-A*03:01                           | HLA-A*11:01 |             | 2              |
| MSCOV038  | DMF       | HLA-A*03:01                           | HLA-A*01:01 |             | 3              |
| MSCOV089  | DMF       | HLA-B*07:02                           | HLA-A*03:01 |             | 1 & 2          |
| MSCOV037  | NTZ       | HLA-A*03:01                           | HLA-A*01:01 |             | 3              |
| MSCOV039  | NTZ       | HLA-A*02:01                           |             |             |                |
| MSCOV052  | NTZ       | HLA-A*02:01                           | HLA-B*07:02 | HLA-A*03:01 | 1 & 2          |
| MSCOV057  | NTZ       | HLA-A*03:01                           |             |             | 2              |
| MSCOV069  | NTZ       | HLA-B*07:02                           |             |             | 1              |
| MSCOV016  | S1P       | HLA-A*02:01                           |             |             | 1              |
| MSCOV050  | S1P       | HLA-B*07:02                           | HLA-A*03:01 |             | 1 & 2          |
| MSCOV060  | S1P       | HLA-A*02:01                           | HLA-B*07:02 |             | 1              |
| MSCOV072  | S1P       | HLA-A*01:01                           |             |             | 3              |
| MSCOV012  | RTX       | HLA-A*01:01                           |             |             | 3              |
| MSCOV025  | RTX       | HLA-B*07:02                           |             |             | 2              |
| MSCOV049  | RTX       | HLA-A*11:01                           |             |             | 2              |
| MSCOV074  | RTX       | HLA-A*02:01                           |             |             | 1              |
| MSCOV076  | RTX       | HLA-A*03:01                           | HLA-A*11:01 |             | 2              |
| MSCOV084  | RTX       | HLA-A*02:01                           |             |             | 1              |
| MSCOV014  | OCR       | HLA-A*11:01                           |             |             | 2              |
| MSCOV022  | OCR       | HLA-B*07:02                           |             |             | 1              |
| MSCOV045  | OCR       | HLA-B*07:02                           |             |             | 1              |
| MSCOV056  | OCR       | HLA-A*02:01                           |             |             | 1              |
| MSCOV058  | OCR       | HLA-A*03:01                           |             |             | 2              |
| MSCOV064  | OCR       | HLA-A*03:01                           | HLA-A*01:01 |             | 3              |

**Supplemental Table 3.** Overview of patient samples used for pMHC I tetramer analysis. HLA restriction refers to the relevant MHC I alleles used for tetramer staining. The tetramer panel refers to the panels outlined in Supplemental Table 2.

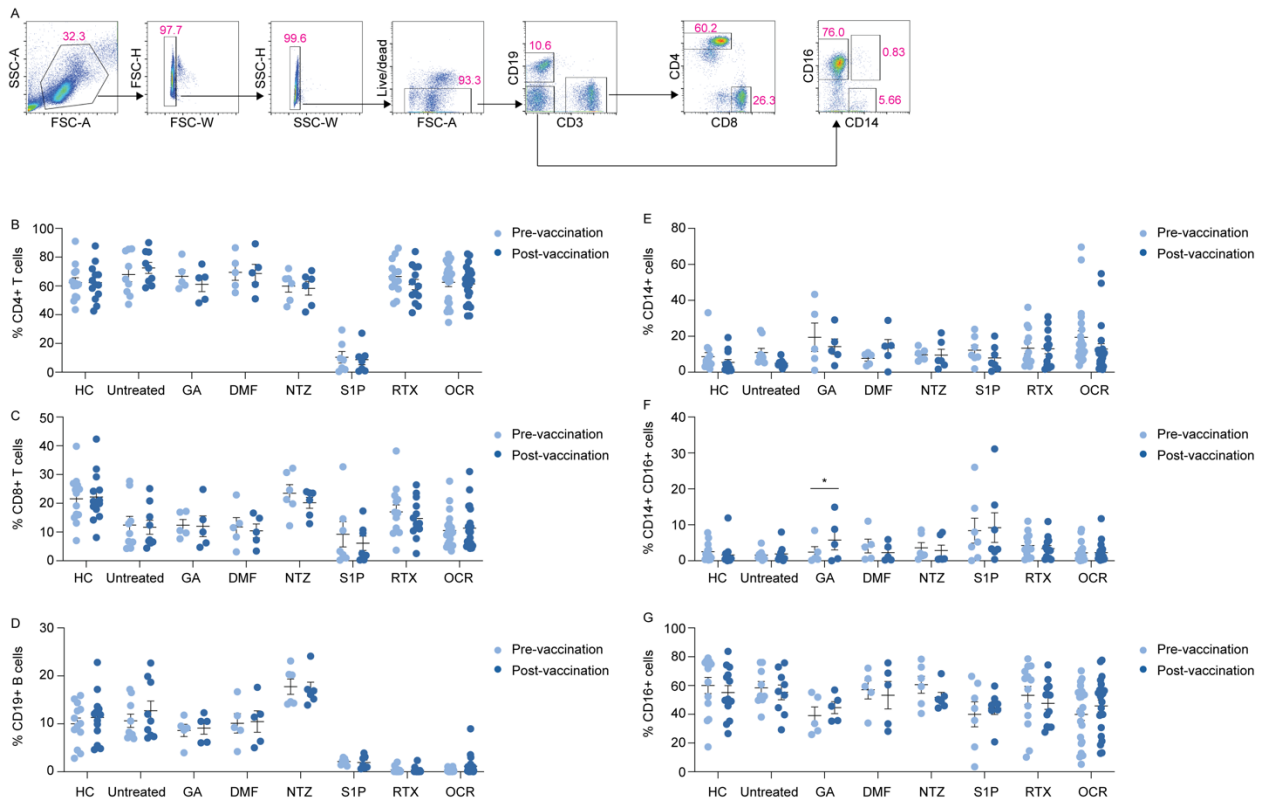

**Supplemental Figure 1.** Representative flow cytometry analysis for identification of immune cell subsets (A). Overview of immune cell subsets across all cohorts before and after vaccination: CD4+ T cells (B), CD8+ T cells (C), CD19+ B cells (D), CD14+ cells (E), CD14+ CD16+ cells (F), CD16+ cells (G). Comparisons of pre- and post-vaccination responses by multiple paired t-tests and comparisons of different patient cohorts by 2-way ANOVA with multiple comparisons.

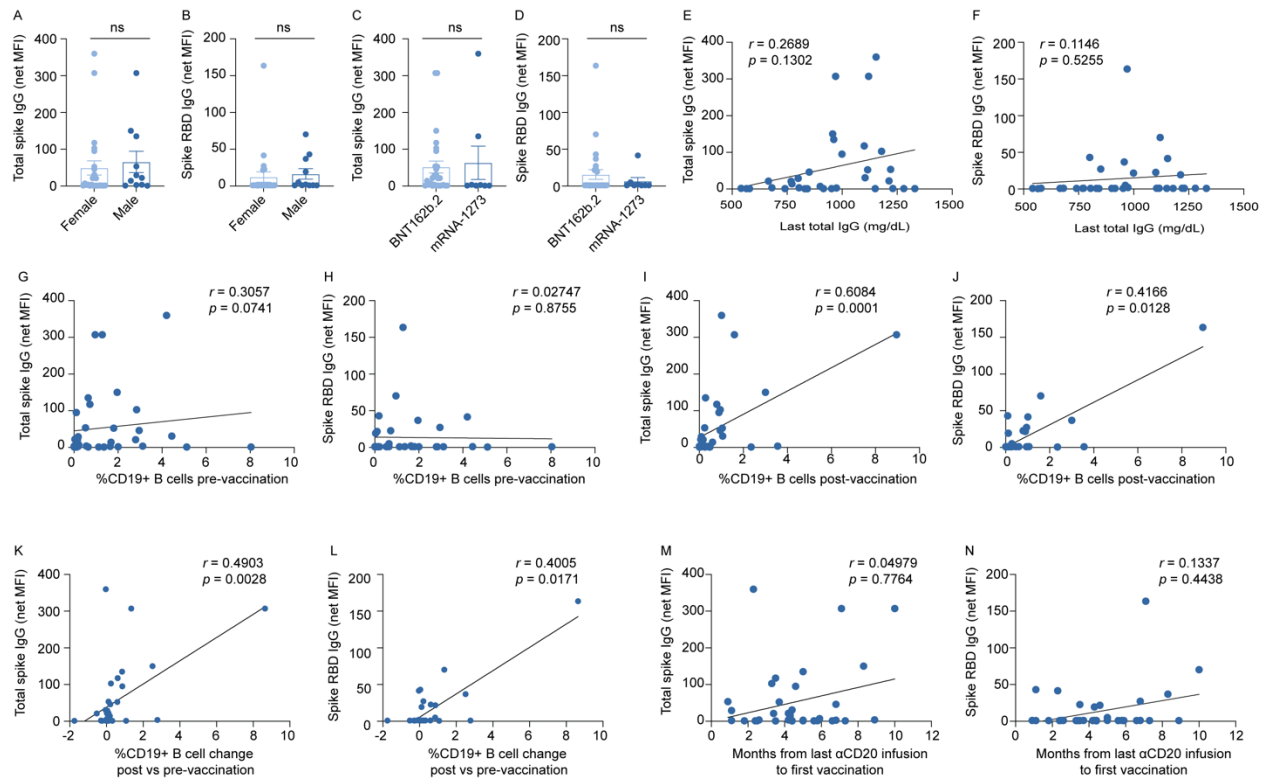

**Supplemental Figure 2. Analysis of vaccine-elicited spike-specific antibody responses in anti-CD20 mAb-treated MS patients.** Post-vaccination net MFI of total spike IgG (**A, C**) and spike RBD IgG (**B, D**) by gender (**A-B**) and mRNA vaccine type (**C-D**), comparisons by Mann-Whitney. Net MFI of total spike IgG and spike RBD IgG versus last total IgG (**E-F**), %CD19+ B cells pre-vaccination (**G-H**), %CD19+ B cells post-vaccination (**I-J**), %CD19+ B cell change pre- vs post-vaccination (**K-L**), and interval (months) from last anti-CD20 mAb infusion to first vaccination (**M-N**), measured by simple linear regression and Spearman correlation.

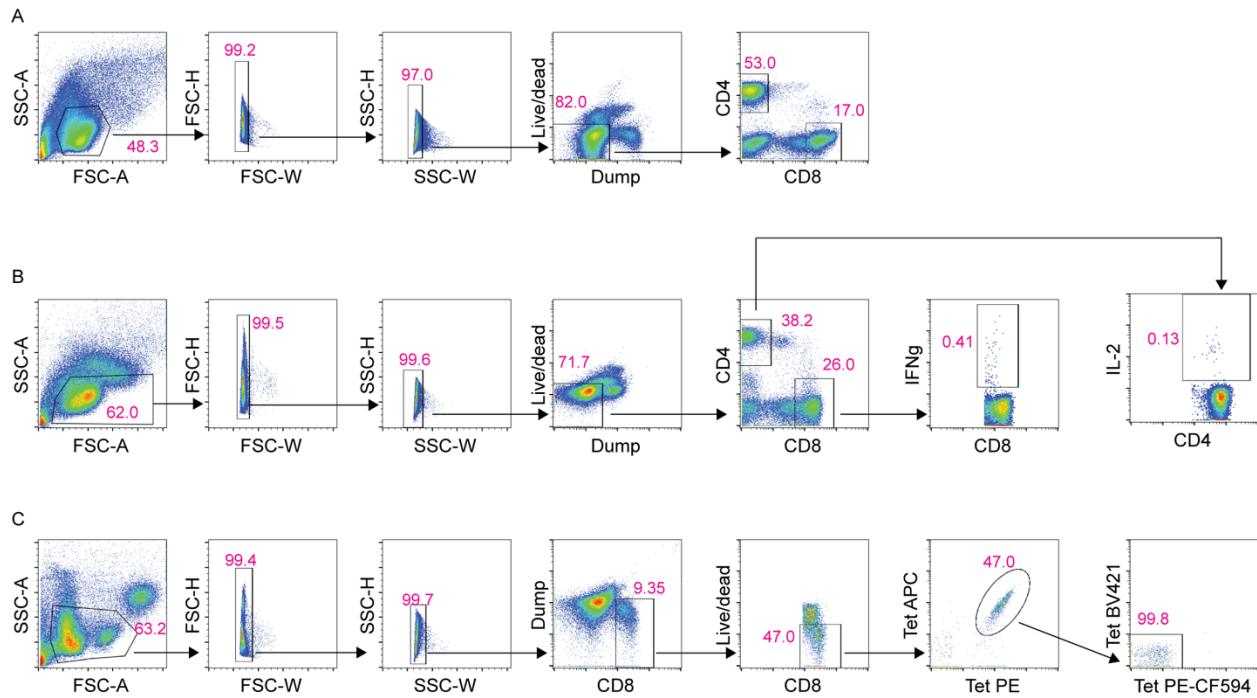

**Supplemental Figure 3. Gating overview for flow cytometry analysis.** Representative gating strategies for AIM (A), ICS (B), and pMHC I tetramer enrichment (C). T cells were identified by live single cell lymphocytes that were dump antibody negative using the antibody panels from Supplemental Table 1. For tetramer enrichment, CD8<sup>+</sup> T cells that were tetramer-positive in two fluorophores were subsequently gated on cells negative for the remaining two fluorophores to ensure specificity of tetramer binding.
